# Supplementary material
Source: Springer Nature journal article supplement (https://www.springermedizin.de/resource/supplementary/12936_2009_920_MOESM1_ESM.pdf/9548538)
Supplement: MOESM1 [file 9548538]

**Additional file 1.** Details of samples of artesunate blisterpacks collected in Laos by stratified random sampling. Data from some of these samples were published in [3,29]. Geographical names follow [44]. In Dye Test – Y = yellow (artesunate detected), C = clear (artesunate not detected) and Cg = clear with gas bubbles (suggesting calcium carbonate). ND= Not detected

| Code                  | District/<br>Province | Stated<br>manufacturer | Batch number<br>Manufacture &<br>Expiry date | Dye<br>test | Packaging<br>[Hologram<br>Type] | Chemical content<br>HPLC mg/tablet | Chemical content (MS,<br>XRD)                                                                                                                | Notes/pollen<br>analysis                                                                      |
|-----------------------|-----------------------|------------------------|----------------------------------------------|-------------|---------------------------------|------------------------------------|----------------------------------------------------------------------------------------------------------------------------------------------|-----------------------------------------------------------------------------------------------|
| 3 Pak 1/1             | Paklai,<br>Xayabury   | Mekophar               | 0041202<br>-----<br>12/05                    | Y           | Genuine                         | Artesunate 49.2                    | Artesunate                                                                                                                                   |                                                                                               |
| 2 Xai P/1<br>2220     | Xay,<br>Oudomxay      | Guilin                 | 990308                                       | C           | [1]                             | Artesunate ND<br>Chloroquine 14.7  | Paracetamol, chloroquine,<br>2-mercaptobenzothiazole                                                                                         |                                                                                               |
| 6 Duk<br>P1/1<br>2221 | Dakcheung,<br>Sekong  | Guilin                 | 010401<br>04/01<br>04/04                     | C           | [5]                             | Artesunate ND                      | Paracetamol, starch,<br>sucrose, calcite 20%, $\delta^{13}\text{C}$<br>-9.60, $\delta^{18}\text{O}$ +5.9 ‰                                   | Charcoal,<br>cellular plant<br>material, no<br>pollen or spores                               |
| Duk P2/1<br>2223      | Dakcheung,<br>Sekong  | Guilin                 | 010401<br>04/01<br>04/04                     | C           | [5]                             | Artesunate ND                      | Paracetamol                                                                                                                                  |                                                                                               |
| Duk P3/1<br>2226      | Dakcheung,<br>Sekong  | Guilin                 | 010401<br>04/01<br>04/04                     | Cg          | [8]                             | Artesunate ND                      | Paracetamol,<br>dimethylfumarate,<br>metamizole, starch, talc.<br>Calcite 82%, $\delta^{13}\text{C}$ -9.62,<br>$\delta^{18}\text{O}$ + 7.9 ‰ | Charcoal.<br>Parenchymatous<br>cells, fungal<br>material and<br>hairs. No pollen<br>or spores |
| 6 Tat<br>P3/1<br>2225 | Thateng,<br>Sekong    | Guilin                 | 010901<br>09/01<br>09/04                     | C           | [4],<br>'Tablte'                | Artesunate ND                      | 2-mercaptobenzothiazole                                                                                                                      |                                                                                               |

|                            |                                          |                    |                          |    |         |                                                      |                                                                                    |  |
|----------------------------|------------------------------------------|--------------------|--------------------------|----|---------|------------------------------------------------------|------------------------------------------------------------------------------------|--|
| 6 Tat<br>P7/1<br>2228      | Thateng,<br>Sekong                       | Guilin             | 010401<br>04/01<br>04/04 | Cg | [5]     | Artesunate ND                                        | Paracetamol                                                                        |  |
| 8 Pek P<br>14/1<br>2230    | Pek,<br>Xiengkhuang                      | Mekophar           | 0031101<br>12 04         | Y  | genuine | Artesunate 45.1,<br>49.7, 50.1                       | Artesunate                                                                         |  |
| 9 Sar<br>P1/1<br>2232      | Saravane,<br>Saravane                    | Guilin             | 010401<br>04/01<br>04/04 | Cg | [11]    | Artesunate ND<br>Artemisinin 0.26<br>Sulphadoxine ND | Paracetamol,<br>sulphadoxine,<br>erythromycin,<br>dimethylfumarate,<br>artemisinin |  |
| 9 Sar<br>P5/1<br>2233      | Saravane,<br>Saravane                    | Guilin             | 010401<br>04/01<br>04/04 | Cg | [5]     | Artesunate ND                                        | Paracetamol,<br>erythromycin                                                       |  |
| 9 Sar<br>P7/1<br>2234      | Saravane,<br>Saravane                    | Guilin             | 010401<br>04/01<br>04/04 | Cg | [5]     | Artesunate ND                                        | Paracetamol, metamizole,<br>erythromycin,<br>dimethylfumarate                      |  |
| 9 Sar<br>P11/1<br>2235     | Saravane,<br>Saravane                    | Pharbaco,<br>Hanoi | 010402<br>0405           | Y  | genuine | Artesunate 48.8,<br>50.3, 46.8                       | Artesunate                                                                         |  |
| 11 Kha<br>P3/1<br>2240 -1  | Khanthabuly,<br>Savannakhet <sup>a</sup> | Guilin             | 010401<br>04/01<br>04/04 | Cg | [5]     | Artesunate ND<br>Artemisinin 4.5                     | Dimethylfumarate,<br>paracetamol, artemisinin                                      |  |
| Kha 11.1<br>P3/2<br>2240-2 | Khanthabuly,<br>Savannakhet <sup>a</sup> | Guilin             | 010401<br>04/01<br>04/04 | Cg | [8]     | Artesunate ND<br>Artemisinin 6.5<br>Sulphadoxine ND  | Sulphadoxine,<br>chloramphenicol,<br>paracetamol, artemisinin                      |  |

|                            |                                          |        |                          |    |     |                                                                 |                                                                                        |                                                                                                                                                        |
|----------------------------|------------------------------------------|--------|--------------------------|----|-----|-----------------------------------------------------------------|----------------------------------------------------------------------------------------|--------------------------------------------------------------------------------------------------------------------------------------------------------|
| Kha 11.1<br>P4/1<br>2241-1 | Khanthabuly,<br>Savannakhet <sup>b</sup> | Guilin | 010401<br>04/01<br>04/04 | C  | [8] | Artesunate ND<br>Pyrimethamine<br>17.1<br>Sulphadoxine<br>409.6 | Pyrimethamine,<br>sulphadoxine,<br>erythromycin                                        |                                                                                                                                                        |
| Kha 11.1<br>P4/2<br>2241-2 | Khanthabuly,<br>Savannakhet <sup>b</sup> | Guilin | 010401<br>04/01<br>04/04 | C  | [8] | Artesunate ND<br>Pyrimethamine<br>16.0<br>sulphadoxine 385.9    | Pyrimethamine,<br>sulphadoxine                                                         |                                                                                                                                                        |
| 11 Kha<br>P5/1<br>2242-1   | Khanthabuly,<br>Savannakhet <sup>c</sup> | Guilin | 010401<br>04/01<br>04/04 | C  | [8] | Artesunate ND                                                   | starch, talc. Calcite 80%,<br>$\delta^{13}\text{C}$ -9.57, $\delta^{18}\text{O}$ 8.7 ‰ | Charcoal.<br>Parenchymatous<br>cells, fungal<br>hyphae,<br>invertebrate<br>remains and<br>hairs. <i>Alsophila</i><br>spores and <i>Pinus</i><br>pollen |
| 11 Kha<br>P5/2<br>2242-2   | Khanthabuly,<br>Savannakhet <sup>c</sup> | Guilin | 010401<br>04/01<br>04/04 | C  | [8] | Artesunate ND                                                   | Chloramphenicol,<br>metamizole                                                         |                                                                                                                                                        |
| 11 Kha<br>P7/1<br>2243-1   | Khanthabuly,<br>Savannakhet <sup>d</sup> | Guilin | 020305<br>03/02<br>03/05 | C  | [4] | Artesunate ND                                                   | Metamizole                                                                             |                                                                                                                                                        |
| 11 Kha<br>P7/2<br>2243-2   | Khanthabuly,<br>Savannakhet <sup>d</sup> | Guilin | 020305<br>03/02<br>03/05 | C  | [4] | Artesunate ND                                                   | Metamizole                                                                             |                                                                                                                                                        |
| 11 Kha<br>P11/1<br>2244-1  | Khanthabuly,<br>Savannakhet <sup>e</sup> | Guilin | 010401<br>04/01<br>04/04 | Cg | [8] | Artesunate ND<br>Pyrimethamine ND<br>Sulphadoxine ND            | Pyrimethamine,<br>sulphadoxine, paracetamol                                            |                                                                                                                                                        |

|                           |                                          |        |                          |     |                     |                                                              |                                                                    |  |
|---------------------------|------------------------------------------|--------|--------------------------|-----|---------------------|--------------------------------------------------------------|--------------------------------------------------------------------|--|
| 11 Kha<br>P11/2<br>2244-2 | Khanthabuly,<br>Savannakhet <sup>e</sup> | Guiin  | 010401<br>04/01<br>04/04 | Cg  | [8]                 | Artesunate ND<br>Sulphadoxine ND<br>pyrimethamine ND         | Sulphadoxine,<br>pyrimethamine,<br>paracetamol                     |  |
| 11 Kha<br>P15/1<br>2245   | Khanthabuly,<br>Savannakhet              | Guilin | 000801<br>08/00<br>08/09 | C   | [7]                 | Artesunate ND<br>Artemisinin 115.7                           | Artemisinin                                                        |  |
| 12 Pas<br>P2/1<br>2262    | Pakse,<br>Champassack                    | Guilin | Cut off                  | --- | Not<br>classifiable | 0 <sup>f</sup><br>Sulphadoxine ND<br>pyrimethamine ND        | Pyrimethamine,<br>sulphadoxine, paracetamol                        |  |
| 12 Pas<br>P10/1<br>2263   | Pakse,<br>Champassack                    | Guilin | 010401<br>04/01<br>04/04 | C   | [8]                 | Artesunate ND<br>Sulphadoxine ND                             | Dimethylfumarate,<br>paracetamol,<br>sulphadoxine,<br>erythromycin |  |
| 12 Pas<br>P11/1<br>2264   | Pakse,<br>Champassack                    | Guilin | 010401<br>04/01<br>04/04 | Cg  | [8]                 | Artesunate ND<br>Pyrimethamine ND<br>Sulphadoxine ND         | Pyrimethamine,<br>sulphadoxine                                     |  |
| 12 Pas<br>P28/1<br>2265   | Pakse,<br>Champassack                    | Guilin | 010401<br>04/01<br>04/04 | C   | [8]                 | Artesunate ND<br>Pyrimethamine<br>16.6 Sulphadoxine<br>413.9 | Paracetamol,<br>pyrimethamine,<br>sulphadoxine                     |  |

|                         |                       |        |                          |   |     |                                                      |                                                                                 |                                                                                                                                                                                                     |
|-------------------------|-----------------------|--------|--------------------------|---|-----|------------------------------------------------------|---------------------------------------------------------------------------------|-----------------------------------------------------------------------------------------------------------------------------------------------------------------------------------------------------|
| 12 Pas<br>P61/1<br>2266 | Pakse,<br>Champassack | Guilin | 010401<br>04/01<br>04/04 | C | [5] | Artesunate ND<br>sulphadoxine ND                     | Paracetamol,<br>sulphadoxine                                                    |                                                                                                                                                                                                     |
| 12 Pas<br>P62/1<br>2267 | Pakse,<br>Champassack | Guilin | 000902<br>09/00<br>09/03 | C | [3] | 0 <sup>f</sup>                                       | Dimethylfumarate, 2-<br>mercaptobenzothiazole<br>and erucamide, Starch,<br>talc | Numerous fine<br>structureless<br>organic particles,<br>fungal hyphae<br>and charcoal. A 5<br>mm long woody<br>strand.<br><i>Artemisia, Ulmus</i><br>and <i>Casuarina</i> or<br><i>Carya</i> pollen |
| 12 Pas<br>P64/1<br>2268 | Pakse,<br>Champassack | Guilin | 010401<br>04/01<br>04/04 | C | [8] | Artesunate ND<br>Pyrimethamine ND<br>Sulphadoxine ND | Pyrimethamine,<br>sulphadoxine                                                  |                                                                                                                                                                                                     |

<sup>a,b,c,d,e</sup> Pairs of samples – each of pair bought at same pharmacy; <sup>f</sup> absence of artesunate determined only by mass spectrometry
